# Supplementary material
Source: HighWire-hosted journal article supplement (https://bmjopen.bmj.com/content/7/5/e013590)
Supplement: inline-supplementary-material-1 [file inline-supplementary-material-1.pdf]

**Appendix I: Characteristics of participants who consented (n=30,445) and refused (n=43,452)  
to take part in the EPIC-Norfolk cohort study**

| <b>Percentage (number)</b> |                  |                        |
|----------------------------|------------------|------------------------|
| <b>Characteristic</b>      | <b>Consented</b> | <b>Did not consent</b> |
| <b>Age</b>                 |                  |                        |
| <50                        | 27.5 (8366)      | 33.7 (14647)           |
| 50-60                      | 30.3 (9230)      | 29.5 (12819)           |
| 60-70                      | 32.5 (9879)      | 27.4 (11898)           |
| >70                        | 9.8 (2970)       | 9.4 (4088)             |
| <b>Sex</b>                 |                  |                        |
| Female                     | 55.0 (16744)     | 49.0 (21296)           |
| Male                       | 45.0 (13701)     | 51.0 (22156)           |
